# Supplementary material
Source: Research Square preprint supplement (doi:10.21203/rs.3.rs-9894524/v1)
Supplement: Supplementary file 1 [file 39316c143e283087f9d75507.docx]

**List of Tables**

Table I. Sampling Distribution Across Organizations (SRSWOR)

| **Organization** | **Total Employees (Nᵢ)** | **Proportion (Nᵢ / N)** | **Sample Size (nᵢ)** |
| --- | --- | --- | --- |
| Company A | 196 | 0.156 | 62 |
| Company B | 203 | 0.161 | 64 |
| Company C | 233 | 0.185 | 74 |
| Company D | 239 | 0.190 | 76 |
| Company E | 202 | 0.160 | 64 |
| Company F | 187 | 0.148 | 60 |
| **Total** | **1260** | **1.000** | **400** |

Table II. Measurement Items

| Construct | No. of items | References |
| --- | --- | --- |
| Green Human Resource Management (GHRM) (5-point Likert scale) | 6 | Kim et al., (2019) |
| Green Organisational Citizenship Behavior (GOCB) (5-point Likert scale) | 7 | (Pham et al., 2019) |
| Big Data Analytical capability (BDAC) (5-point Likert scale) | 4 | (M. Gupta & George, 2016; Mikalef et al., 2019) |
| Economic Social Governance performance (ESG) (5-point Likert scale) | 17 | (MP et al., 2017; Paulraj, 2011; Zhu & Huang, 2023) |

Table III. Demographic details of the respondents

| **Variables** | **Indicators** | **Frequency** | **Percentage** |
| --- | --- | --- | --- |
| Gender | Male | 260 | 65.00% |
|  | Female | 140 | 35.00% |
| **Total** |  | **400** | **100%** |
| Age | 18–24 years | 40 | 10.00% |
|  | 25–29 years | 90 | 22.50% |
|  | 30–34 years | 110 | 27.50% |
|  | 34–39 years | 130 | 32.50% |
|  | 40 and above years | 30 | 7.50% |
| **Total** |  | **400** | **100%** |
| Experience | 1–4 Years | 120 | 30.00% |
|  | 5–9 years | 110 | 27.50% |
|  | 10–14 years | 108 | 27.00% |
|  | 15–19 years | 43 | 10.80% |
|  | 20 years and above | 19 | 4.80% |
| **Total** |  | **400** | **100%** |
| Designation | Managerial | 277 | 69.30% |
|  | Non-Managerial | 123 | 30.80% |
| **Total** |  | **400** | **100%** |

Table IV. Reliability & Validity Assessment

| ***Construct*** | ***Items*** | ***Factor Loadings*** | ***Cronbach’s alpha*** | ***CR*** | ***AVE*** | ***VIF*** |
| --- | --- | --- | --- | --- | --- | --- |
| *Green Human Resource Management (GHRM)* | GHRM1 | 0.892 | 0.950 | 0.960 | 0.799 | 3.516 |
| GHRM2 | 0.903 | 3.802 |
| GHRM3 | 0.898 | 3.67 |
| GHRM4 | 0.881 | 3.203 |
| GHRM5 | 0.902 | 3.76 |
| GHRM6 | 0.887 | 3.353 |
| *Green Organisational Citizenship Behaviour (GOCB)* | GOCB1 | 0.853 | 0.933 | 0.946 | 0.713 | 2.759 |
| GOCB2 | 0.86 | 2.846 |
| GOCB3 | 0.834 | 2.559 |
| GOCB4 | 0.842 | 2.605 |
| GOCB5 | 0.831 | 2.47 |
| GOCB6 | 0.856 | 2.774 |
| GOCB7 | 0.835 | 2.543 |
| *Environmental performance (EP)* | EP1 | 0.879 | 0.941 | 0.953 | 0.772 | 3.126 |
| EP2 | 0.878 | 3.136 |
| EP3 | 0.869 | 2.877 |
| EP4 | 0.895 | 3.68 |
| EP5 | 0.856 | 2.737 |
| EP6 | 0.893 | 3.481 |
| *Social Performance (SP)* | SP1 | 0.889 | 0.936 | 0.951 | 0.796 | 3.137 |
| SP2 | 0.901 | 3.513 |
| SP3 | 0.892 | 3.176 |
| SP4 | 0.886 | 3.143 |
| SP5 | 0.893 | 3.261 |
| *Governance (GP)* | GP1 | 0.878 | 0.940 | 0.952 | 0.769 | 3.092 |
| GP2 | 0.881 | 3.123 |
| GP3 | 0.862 | 2.787 |
| GP4 | 0.887 | 3.286 |
| GP5 | 0.875 | 3.035 |
| GP6 | 0.877 | 3.066 |
| *Big Data Analytical capability (BDAC)* | BDAC1 | 0.899 | 0.943 | 0.957 | 0.846 | 4.18 |
| BDAC2 | 0.905 | 4.106 |
| BDAC3 | 0.931 | 3.612 |
| BDAC4 | 0.945 | 4.031 |

Source: Compiled by authors

Table V. HTMT Correlation test result

| ***Variables*** | BDAC | EP | GHRM | GOCB | GP | SP |
| --- | --- | --- | --- | --- | --- | --- |
| BDAC |  |  |  |  |  |  |
| EP | 0.031 |  |  |  |  |  |
| GHRM | 0.102 | 0.684 |  |  |  |  |
| GOCB | 0.082 | 0.723 | 0.657 |  |  |  |
| GP | 0.047 | 0.993 | 0.683 | 0.721 |  |  |
| SP | 0.034 | 0.995 | 0.689 | 0.721 | 0.99 |  |

Source: Compiled by authors

Table VI. Validation of Higher-order construct: ESG Performance

| ***HOC*** | ***LOC*** | ***Outer loadings*** | ***Outer weights*** | ***t-value*** | ***p-value*** | ***VIF*** |
| --- | --- | --- | --- | --- | --- | --- |
| ESG Performance | EP | 0.978 | 0.337 | 2.304 | 0.011 | 3.535 |
| SP | 0.978 | 0.358 | 2.681 | 0.004 | 3.686 |
| GP | 0.976 | 0.328 | 2.377 | 0.009 | 3.756 |

Source: Compiled by authors

Table VII. Path Co-efficient values

| Hypothesis | Path analysis | Β-value | SD | t-value | p-value | Decision |
| --- | --- | --- | --- | --- | --- | --- |
| H1 | GHRM→ESG | 0.380 | 0.041 | 9.319 | 0.000 | Supported |
| H2 | GHRM→GOCB | 0.599 | 0.034 | 17.443 | 0.000 | Supported |
| H3 | GOCB→ESG | 0.457 | 0.042 | 10.965 | 0.001 | Supported |
| H5 | BDAC×GHRM→GOCB | 0.348 | 0.042 | 5.227 | 0.000 | Supported |
| Note: R2 = 50.3% (GOCB), 56.8% (ESG Performance); Q2 = 49.6% (GOCB), 45.7% (ESG Performance) | | | | | | |

Source: Compiled by authors

Table VIII. Mediation Analysis

| **Total Indirect Effect (GHRM-> ESG)** | | | **Direct effects** | | | **Indirect effect** | | | | | | | | |
| --- | --- | --- | --- | --- | --- | --- | --- | --- | --- | --- | --- | --- | --- | --- |
| **Coefficient** | **T-value** | **P-value** | **Coefficient** | **t-value** | **P-value** | **Hypothesis** | **Coefficient** | **t-value** | **P-value** | | **Percentile bootstrap** | | | **Decision (Mediation type)** |
|  | | | | | | | | | | **Lower** | | **Upper** | |  |
| 0.653 | 23.067 | 0.000 | 0.380 | 9.319 | 0.000 | H4: GHRM->GOCB->ESG | 0.273 | 9.292 | 0.001 | | 0.227 | | 0.324 | Partial |

Source: Compiled by authors

Table IX. Moderated Mediation

| **Moderated Indirect Relationship** | **Direct Effect** | **Indirect effect** | **CI: Low /High** | **p-value** |
| --- | --- | --- | --- | --- |
| GHRM→GOCB→ESG | 0.380  (9.319) | 0.273  (9.292) | 0.227/0.324 | 0.000 |
| ***Probing Moderated Indirect Relationship*** |  |  | | |
| Low Level of Big Data Analytical Capability (BDAC) | 0.114  (2.886) | 0.062/0.171 | 0.000 |
| High Level of Big Data Analytical Capability (BDAC) | 0.432  (8.552) | 0.359/0.521 | 0.000 |
| Mean Level of Big Data Analytical Capability (BDAC) | 0.273  (9.292) | 0.227/0.324 | 0.000 |
| Index of Moderated Mediation | 0.159  (4.59) | 0.117/0.212 | 0.000 |

Source: Compiled by authors
